# Supplementary material for: A critical courier role of volatile oils from Dalbergia odorifera for cardiac protection in vivo by QiShenYiQi
Source: Sci Rep. 2017 Aug 4;7:7353. doi: 10.1038/s41598-017-07659-x (PMC5544742; doi:10.1038/s41598-017-07659-x)
Supplement: Supplementary file 1 — Supplementary Information [file 41598_2017_7659_MOESM1_ESM.pdf]

# **A critical courier role of volatile oils from *Dalbergia odorifera* for cardiac protection *in vivo* by QiShenYiQi**

Jiahui Yu<sup>1, 2#</sup>, Wen Zhang<sup>1, 3#</sup>, Yiqian Zhang<sup>3, 4</sup>, Yadong Wang<sup>1</sup>, Boli Zhang<sup>1</sup>, Guanwei Fan<sup>1, 5\*</sup>, Yan Zhu<sup>1, 2\*</sup>

<sup>1</sup>Tianjin State Key Laboratory of Modern Chinese Medicine, Tianjin University of Traditional Chinese Medicine, Tianjin, China

<sup>2</sup>Research and Development Center of TCM, Tianjin International Joint Academy of Biotechnology & Medicine, Tianjin, China

<sup>3</sup>State Key Laboratory of Core Technology in Innovative Chinese Medicine, Tianjin Tasly Holding Group Co., Ltd., Tianjin, China

<sup>4</sup>State Key Laboratory of Natural Medicines, China Pharmaceutical University, Nanjing, China

<sup>5</sup>The First Teaching Hospital of Tianjin University of Traditional Chinese Medicine Tianjin, China,

# Equal contribution to this work

\* Correspondence should be addressed to Yan Zhu, [yanzhu.harvard@iCloud.com](mailto:yanzhu.harvard@iCloud.com) (YZ) and Guanwei Fan, [fgw1005@hotmail.com](mailto:fgw1005@hotmail.com) (GWF)

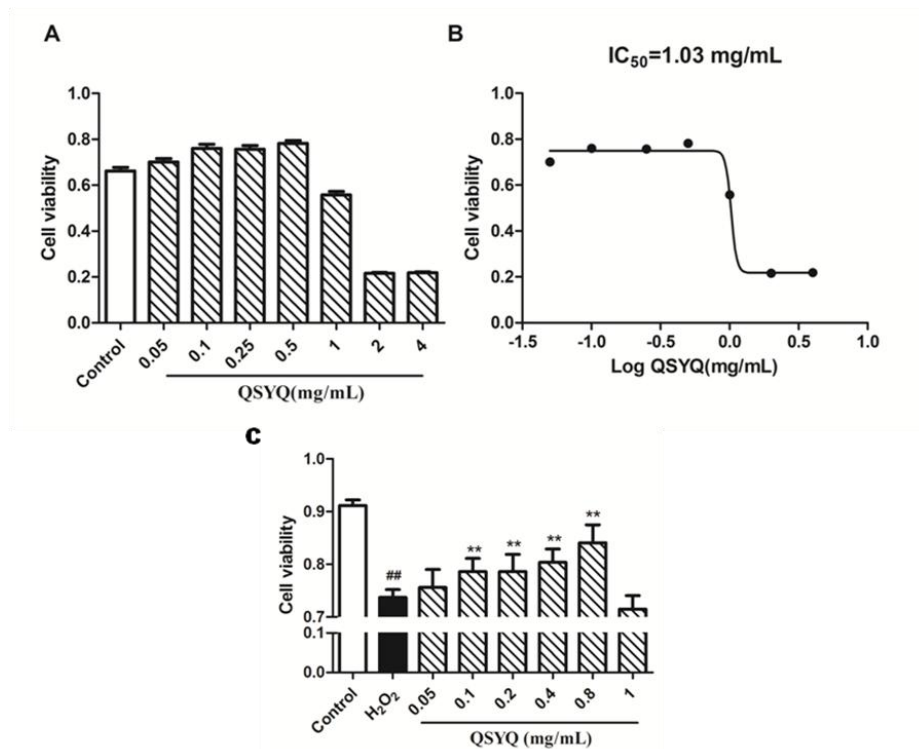

**Supplementary Fig S1. Determination of *in vitro* QSYQ dose by cell viability assay.** (A) Toxicity concentration of QSYQ to untreated cells. (B)  $IC_{50}$  curve of QSYQ. (C) QSYQ increased cell viability in concentration-dependent manner. Data are expressed as the mean  $\pm$  SD,  $n=3$ . <sup>##</sup> $p<0.01$  vs. Control group. <sup>\*\*</sup> $p<0.01$  vs.  $H_2O_2$  group.
